# Supplementary material for: COL11A1 acted as a downstream of Mist1 to promote the EMT in pancreatic cancer
Source: Research Square preprint supplement (doi:10.21203/rs.3.rs-108113/v1), 2020-11-17
Supplement: Supplementary file 1 [file a082f2ca8de178937cc11644.xlsx]

## Sheet: Sheet1
Category	Term	Count	%	PValue	Genes	List Total	Pop Hits	Pop Total	Fold Enrichment	Bonferroni	Benjamini	FDR
KEGG_PATHWAY	hsa05212:Pancreatic cancer	5	0.0158218	0.00509227	EGFR, TGFBR2, RALB, CDK6, RALGDS	75	65	6879	7.05538	0.551358	0.551358	5.95966
KEGG_PATHWAY	hsa04520:Adherens junction	5	0.0158218	0.00696343	EGFR, PTPRM, TGFBR2, LMO7, CTNNB1	75	71	6879	6.45915	0.666157	0.422208	8.06642
KEGG_PATHWAY	hsa04015:Rap1 signaling pathway	8	0.0253149	0.0071158	FYB, EGFR, MAGI3, ADCY2, ADORA2B, RALB, RALGDS, CTNNB1	75	210	6879	3.4941	0.674103	0.311834	8.23606
KEGG_PATHWAY	hsa05200:Pathways in cancer	11	0.0348079	0.00892249	EGFR, LAMA1, ADCY2, TGFBR2, RALB, CDK6, RARB, STK4, SUFU, RALGDS, CTNNB1	75	393	6879	2.56723	0.755152	0.296565	10.2257
KEGG_PATHWAY	hsa04912:GnRH signaling pathway	5	0.0158218	0.0163156	EGFR, PLA2G4A, ADCY2, MAP3K3, ITPR2	75	91	6879	5.03956	0.924428	0.403415	17.9623
KEGG_PATHWAY	hsa00564:Glycerophospholipid metabolism	5	0.0158218	0.0188228	PLD3, PLA2G4A, PLA2G16, DGKB, PTDSS1	75	95	6879	4.82737	0.949377	0.391784	20.4439
KEGG_PATHWAY	hsa05223:Non-small cell lung cancer	4	0.0126574	0.0220458	EGFR, CDK6, RARB, STK4	75	56	6879	6.55143	0.9698	0.393462	23.5328
KEGG_PATHWAY	hsa05231:Choline metabolism in cancer	5	0.0158218	0.0230119	EGFR, PLA2G4A, DGKB, TSC1, RALGDS	75	101	6879	4.54059	0.974141	0.366747	24.437
KEGG_PATHWAY	hsa05146:Amoebiasis	5	0.0158218	0.0269052	GNAL, IL1R2, LAMA1, C9, COL11A1	75	106	6879	4.32642	0.986185	0.378598	27.9826
KEGG_PATHWAY	hsa04724:Glutamatergic synapse	5	0.0158218	0.0339137	PLA2G4A, GRM3, SLC1A3, ADCY2, ITPR2	75	114	6879	4.02281	0.995559	0.418232	33.9833
KEGG_PATHWAY	hsa00591:Linoleic acid metabolism	3	0.00949307	0.0384416	CYP3A4, PLA2G4A, PLA2G16	75	29	6879	9.48828	0.997876	0.4285	37.6124
KEGG_PATHWAY	hsa04510:Focal adhesion	6	0.0189861	0.0702032	EGFR, ITGA9, LAMA1, VAV3, COL11A1, CTNNB1	75	206	6879	2.67146	0.999989	0.614157	58.3587
KEGG_PATHWAY	hsa04921:Oxytocin signaling pathway	5	0.0158218	0.0775054	EGFR, PLA2G4A, CACNA2D1, ADCY2, ITPR2	75	150	6879	3.05733	0.999997	0.62254	62.1287
KEGG_PATHWAY	hsa00565:Ether lipid metabolism	3	0.00949307	0.0840589	PLD3, PLA2G4A, PLA2G16	75	45	6879	6.11467	0.999999	0.62643	65.2428
KEGG_PATHWAY	hsa04915:Estrogen signaling pathway	4	0.0126574	0.090297	EGFR, ADCY2, CREB5, ITPR2	75	99	6879	3.70586	1	0.628622	67.9873
KEGG_PATHWAY	hsa04014:Ras signaling pathway	6	0.0189861	0.0953409	EGFR, PLA2G4A, PLA2G16, RALB, STK4, RALGDS	75	226	6879	2.43504	1	0.625882	70.0594
